# Supplementary material for: In situ NMR reveals real-time nanocrystal growth evolution via monomer-attachment or particle-coalescence
Source: PubMed Central journal article supplement (PMC7801738; doi:10.1038/s41467-020-20512-6), 2021-01-11
Supplement: 41467_2020_20512_MOESM1_ESM.pdf [file 41467_2020_20512_MOESM1_ESM.pdf]

## **Supplementary Information**

### ***In-situ* NMR reveals real-time nanocrystal growth evolution via monomer-attachment or particle-coalescence**

Reut Mashiach<sup>1</sup>, Haim Weissman<sup>1</sup>, Liat Avram<sup>2</sup>, Lothar Houben<sup>2</sup>,  
Olga Brontvein<sup>2</sup>, Anna Lavie<sup>3</sup>, Vaishali Arunachalam<sup>3</sup>, Michal Leskes<sup>3</sup>,  
Boris Rybtchinski<sup>1</sup>, Amnon Bar-Shir<sup>1\*</sup>

<sup>1</sup>Department of Organic Chemistry, <sup>2</sup>Department of Chemical Research Support,

<sup>3</sup>Department of Materials and Interfaces, Weizmann Institute of Science,  
Rehovot, 7610001, Israel

\*Corresponding Author: [amnon.barshir@weizmann.ac.il](mailto:amnon.barshir@weizmann.ac.il)

## **Methods**

### **Synthesis of AEF<sub>2</sub> NCs coated with AEP**

A 25 ml solution of AEP (0.17M) and NaF (0.08M) in ddH<sub>2</sub>O (milli-Q grade) pH=7, (neutralized with ammonium hydroxide) was heated to 60°C under stirring. Then, 1 ml M(NO<sub>3</sub>)<sub>2</sub> (M=Ca<sup>2+</sup>/Sr<sup>2+</sup>) (0.04M) was rapidly added to the hot solution. After 100 min at 60°C, the solution was removed from the heating plate and cooled to room temperature. Then, the solution was centrifuged and washed with ethanol/ddH<sub>2</sub>O.

For *in-situ* synthesis, a 1 ml solution of AEP/citric acid (0.17M) and NaF (0.08M) in ddH<sub>2</sub>O pH=7 (neutralized with ammonium hydroxide) was placed inside a 5 mm NMR tube. Then, M(NO<sub>3</sub>)<sub>2</sub> (0.04M) was injected and the tube was inserted into the NMR spectrometer at 25°C.

### **In-situ NMR**

*In-situ* NMR experiments were performed with the sample temperature stabilized at 25°C. <sup>19</sup>F-NMR (376.7 MHz) spectra were acquired with a 30° flip angle, according to Ernst theory. Ernst angle conditions were used in order to maximize SNR in a given time unit and to shorten the experiment time and, thus, to allow optimal temporal resolution. The conditions were determined according to the equation  $\cos(\alpha) = e^{-TR/T_1}$  with TR and according to the T<sub>1</sub> relaxation properties of the studied AEP-MF<sub>2</sub> (M = Ca<sup>2+</sup> or Sr<sup>2+</sup>) and Cit-CaF<sub>2</sub> NCs. First, T<sub>1</sub>=2.7sec was found for AEP-MF<sub>2</sub> (M = Ca<sup>2+</sup> or Sr<sup>2+</sup>) and T<sub>1</sub>=4sec for Cit-CaF<sub>2</sub> from the inversion recovery (IR) experiment. For the *in-situ* experiment of AEP-MF<sub>2</sub> (M = Ca<sup>2+</sup> or Sr<sup>2+</sup>) the experiment time was set to 3 min and resulted in the following  $\alpha$  and TR values:  $\alpha=30^\circ$  and TR=0.39 sec. For Cit-CaF<sub>2</sub> experiment time was set to 3:40 min and resulted in  $\alpha=30^\circ$  and TR=0.57 sec. Sequential <sup>19</sup>F-NMR spectra were acquired with 240 scans for all experiments. At the end of all real-time syntheses (1200 min), we obtained an additional <sup>19</sup>F spectrum of the end product together with a capillary filled with trifluoroacetate (with a known F<sup>-</sup> concentration) for an appropriate qualitative and quantitative calibration between the different experiments.

<sup>31</sup>P *in-situ* NMR were acquired according to the following parameters: T<sub>1</sub>=3 sec for AEP-CaF<sub>2</sub>/SrF<sub>2</sub> ligands, TR=15 sec, NS=12.

### **Solid State NMR**

$^{19}\text{F}$  solid state NMR experiments were performed on a 9.4 T (400 MHz) Avance III spectrometer using a Bruker 1.3 mm double-resonance probe at magic angle spinning (MAS) rate of 60 kHz. Spectra were recorded within 2 scans using a single pulse excitation of  $1.9\mu\text{s}$  (133 kHz nutation frequency) with a relaxation delay of 30 s between each scan. The relaxation delay was longer than 5 times the longitudinal relaxation time measured by saturation recovery. The chemical shift was referenced with respect to LiF standard set at -204 ppm.

### **Line Fitting Procedure**

The high-resolution  $^{19}\text{F}$ -NMR spectrum of AEP- $\text{CaF}_2$  NCs shown in Fig 2b was decomposed into three Lorentzian peaks centered at -105, -109 and -120 ppm using non-linear least squares fit from MATLAB's curve fitting toolbox. The goodness of fit was evaluated using R-square which ranged from 0.96 to 0.98. The integrated area under each Lorentzian peak was obtained using MATLAB's inbuilt function. The  $^{19}\text{F}$ -NMR spectra of AEP- $\text{SrF}_2$  NCs (Fig 3d) and Cit- $\text{CaF}_2$  NCs (Fig 4b) were similarly decomposed and their respective integrated area evaluated.

### **X-Ray Diffraction (XRD)**

Diffraction measurements were carried out with reflection geometry using an Ultima III (Rigaku, Japan) diffractometer equipped with a sealed, Cu anode X-ray tube operating at 40 kV and 40 mA. A bent graphite monochromator and a scintillation detector were aligned in the diffracted beam.  $\theta/2\theta$  scans were performed under specular conditions in the Bragg-Brentano mode with variable slits. The  $2\theta$  scanning range was 10–120 degrees, with a step size of 0.025 degrees and a scan speed of 0.5 degrees per minute. Phase analysis was performed using the PDF-4+ 2015 database (ICDD) and Jade 9.5 software (Materials Data, Inc.).

### **Dynamic Light Scattering (DLS)**

The diameter and size distribution of the obtained nanoparticles were evaluated by dynamic light scattering, Malvern Nano-ZS. Measurements were taken in a 12.5 mm diameter plastic cuvette according to the appropriate solvent viscosity (for water = 0.8827 cp).

## **Transmission Electron Microscopy (TEM)**

STEM and hyperspectral EDS data (Fig.1) were taken in a probe and image-corrected Themis-Z transmission electron microscope (Thermo Fisher Scientific Microscopy Solutions, Hillsboro, USA) equipped with a Super-X SSD detector at an acceleration voltage of 200 kV. Dry samples were prepared by drop cast deposition on an ultra-thin carbon support foil. TEM and high-resolution TEM (HRTEM) images (Fig.5) were acquired with a JEOL JEM 2100 high-resolution electron microscope, Gatan Digital Micrograph. Accelerating voltage was 200 kV, a beam source of an LaB6 thermal emission, and a bottom-mount CCD camera (Gatan Ultra scanXP 2k x 2k).

## **Cryo-TEM**

For the preparation of the cryo-TEM specimens, a 6.5  $\mu\text{L}$  sample (according to the appropriate synthesis upon injection of the second precursor) was applied to a 200-mesh copper grid coated with holey carbon (Pacific Grid-Tech supplies). The grid was subjected to a 1 min glow discharge before sample application. Samples were blotted at 22°C and 95% relative humidity and then plunged into liquid ethane using a Leica EM-GP Automatic Grid Plunger. Specimens were equilibrated at -178°C in the microscope prior to imaging. Cryo-TEM was performed on a Tecnai F20 twin-transmission electron microscope (Thermo-Fisher corporation) operating at an acceleration voltage of 200 kV. Cryogenically preserved samples were loaded into a Gatan 626 cryoholder. Low-dose TEM images were recorded with a Gatan US4000 CCD. Two different samples were prepared: 1. AEP-CaF<sub>2</sub>, 6 min after the injection of Ca<sup>+2</sup> into a solution containing both AEP and F<sup>-</sup> (according to the synthesis described above). 2. AEP-SrF<sub>2</sub>, 1000 min after the injection of Ca<sup>+2</sup> into a solution containing both AEP and F<sup>-</sup> (according to the synthesis described above). Cryo-TEM was performed on a Talos Arctica (TFS) TEM at an acceleration voltage of 200 kV. Low-dose cryo-TEM images were recorded with a Gatan OneView 4kx4k CMOS camera. Two different samples were prepared at different stages of AEP-CaF<sub>2</sub> formation: 200 min and 1000min after the injection of Ca<sup>+2</sup> into a solution containing both AEP and F<sup>-</sup> (according to the synthesis described above).

## Supporting Figures

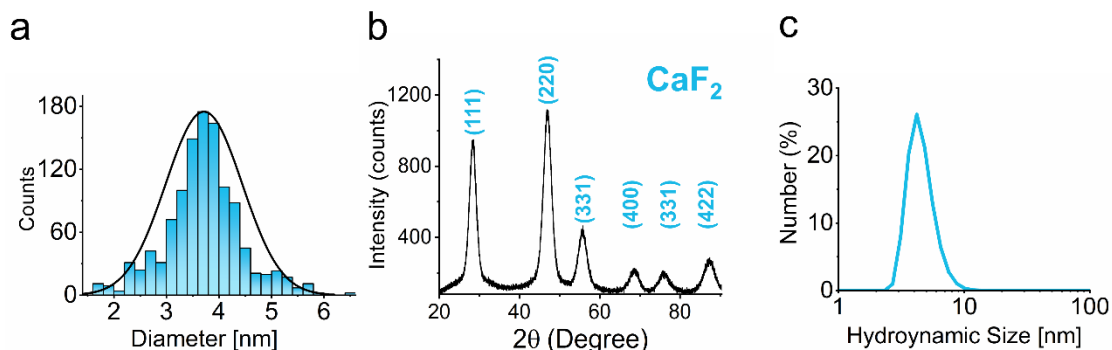

**Supplementary Figure 1. Characterization of the CaF<sub>2</sub>-AEP NC** (a) particle size distribution histogram by TEM ( $D_{\text{TEM}}=3.7\pm 0.6$  nm) (b) XRD patterns of the crystalline CaF<sub>2</sub>. (c) Hydrodynamic size distribution with DLS ( $D_{\text{DLS}}=4.6 \pm 1.2$  nm).

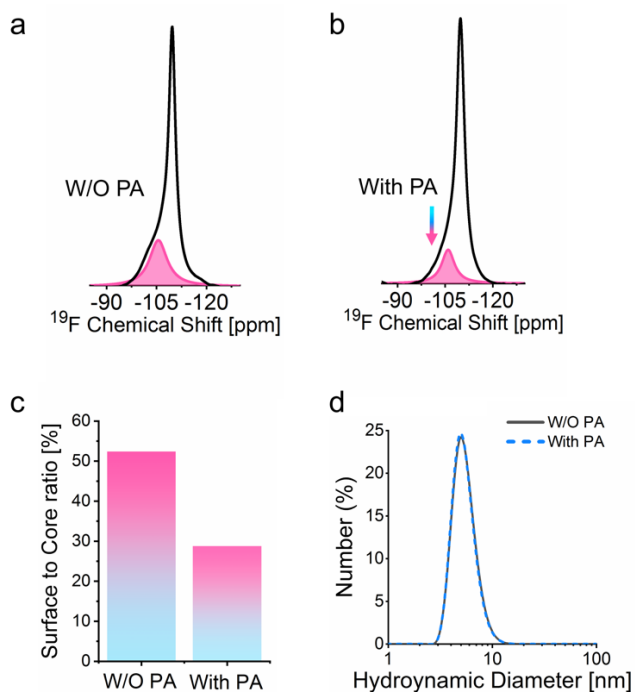

**Supplementary Figure 2. The effect of paramagnetic agent (PA) on the <sup>19</sup>F-NMR spectra of AEP-CaF<sub>2</sub> NCs in water.** <sup>19</sup>F -NMR spectra of AEP-CaF<sub>2</sub> NCs in water and the convolved peak area at -105 ppm, assigned to the surface atoms before (a) and after (b) the addition of SmCl<sub>3</sub> salt as the PA to the studied solution. (c) The ratio of the integrated area of the <sup>19</sup>F-NMR peaks assigned to surface (-105 ppm) and core (-109 ppm) atoms, with and without the PA. (d) The hydrodynamic diameter (by DLS) of AEP-CaF<sub>2</sub> NCs in water with and without the addition of SmCl<sub>3</sub> salt as the PA showing no change in the NCs' size.

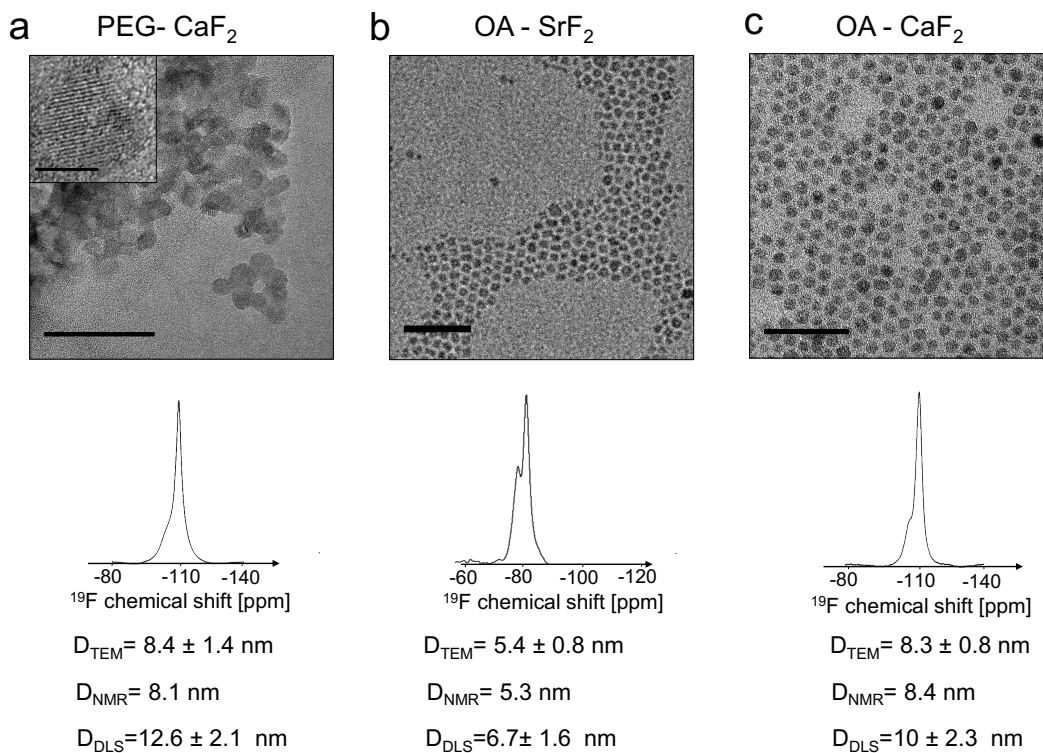

**Supplementary Figure 3.  $\text{MF}_2$  ( $M=\text{Ca}^{2+}$  or  $\text{Sr}^{2+}$ ) NCs and their size measurements with TEM  $^{19}\text{F}$  NMR and DLS.** (a) PEG- $\text{CaF}_2$  in water (scale bar 50nm, inset is 5nm). (b) OA- $\text{SrF}_2$  in cyclohexane (scale bar 50nm). (c) OA- $\text{CaF}_2$  in cyclohexane (scale bar 100nm).

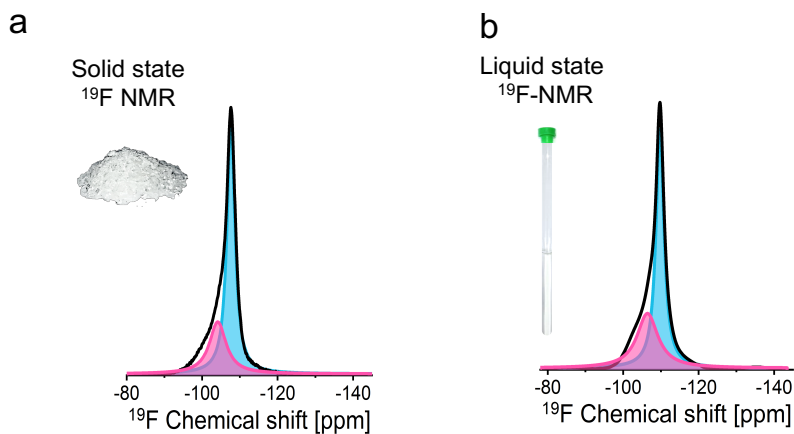

**Supplementary Figure 4.  $^{19}\text{F}$  NMR of AEP- $\text{CaF}_2$  NCs.** (a) Solid state NMR of a dried powder with MAS of 60 kHz. (b) High resolution  $^{19}\text{F}$  NMR of NCs in water.

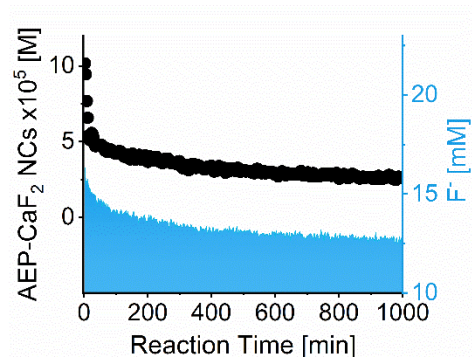

**Supplementary Figure 5. Real-time  $^{19}\text{F}$  NMR of  $\text{F}^-$  concentration during the formation of AEP- $\text{CaF}_2$ .** Concentration of AEP- $\text{CaF}_2$  NCs in water (left y-axis, black) or  $\text{F}^-$  ion consumption (right axis, light blue) as a function of the reaction time.

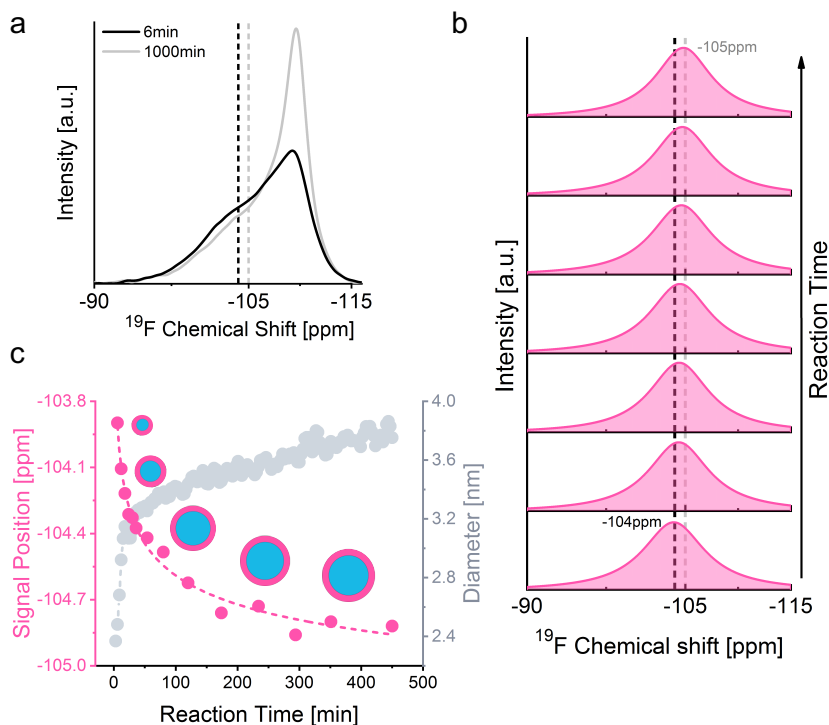

**Supplementary Figure 6. Temporal evolution of the  $^{19}\text{F}$ -NMR spectra as a function of the AEP- $\text{CaF}_2$  reaction time.** (a) Representative  $^{19}\text{F}$ -NMR spectra of the reaction mixture of AEP- $\text{CaF}_2$  6 min (black) and 1000 min (grey) after reaction initiation. (b) The temporal evolution of the deconvolved peak assigned to the surface fluorides (at -105 ppm) throughout the formation of AEP- $\text{CaF}_2$  NCs (from bottom to top: 6, 36, 54, 81, 120, 234 and 444 min after reaction initiation). Dashed lines in (a) and (b) are reference lines representing the chemical shift values at -104 ppm (black) and -105 ppm (grey). (c) Left Y-axis: The chemical shift of the deconvolved peaks assigned to the surface fluorides as a function of the reaction time. Right Y-axis: The calculated diameter of the newly formed AEP- $\text{CaF}_2$  NCs as a function of the reaction time.

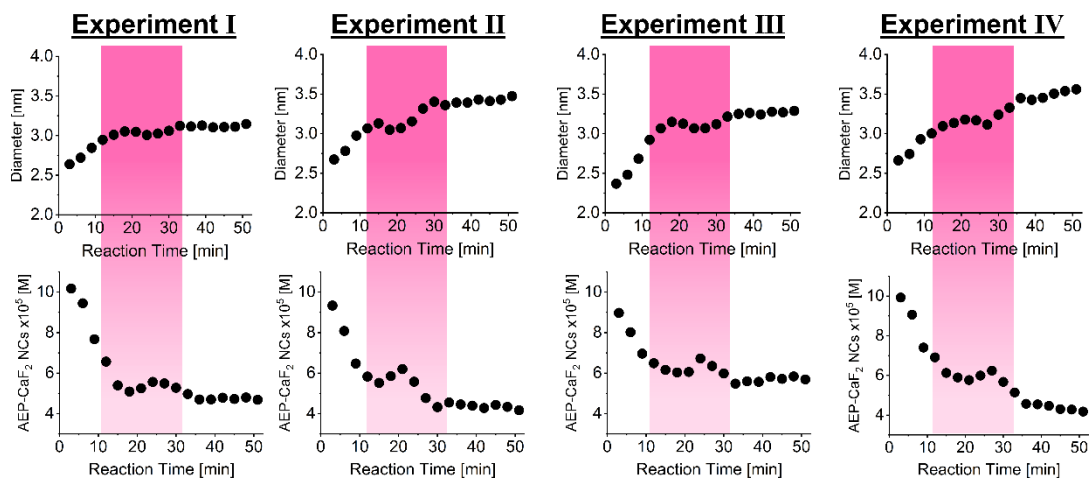

**Supplementary Figure 7. Real-time, high-resolution  $^{19}\text{F}$ -NMR of AEP- $\text{CaF}_2$  NC evolution in water (first 60 min of the reaction). Results from four independent experiments showing the evolution of the AEP- $\text{CaF}_2$  NC diameter (top) and their concentrations (bottom) in water throughout the reaction process.**

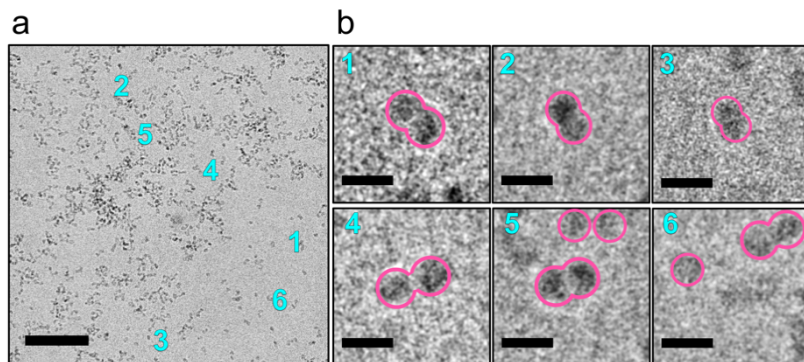

**Supplementary Figure 8. Cryo-TEM of AEP- $\text{CaF}_2$  NCs in water (25 min after reaction initiation); (a) Cryo-TEM image with six (1-6) notations of regions with coalescing NCs, scale bar=50 nm. (b) Zoom-in of regions 1-6 shown in (a), scale bar=5 nm.**



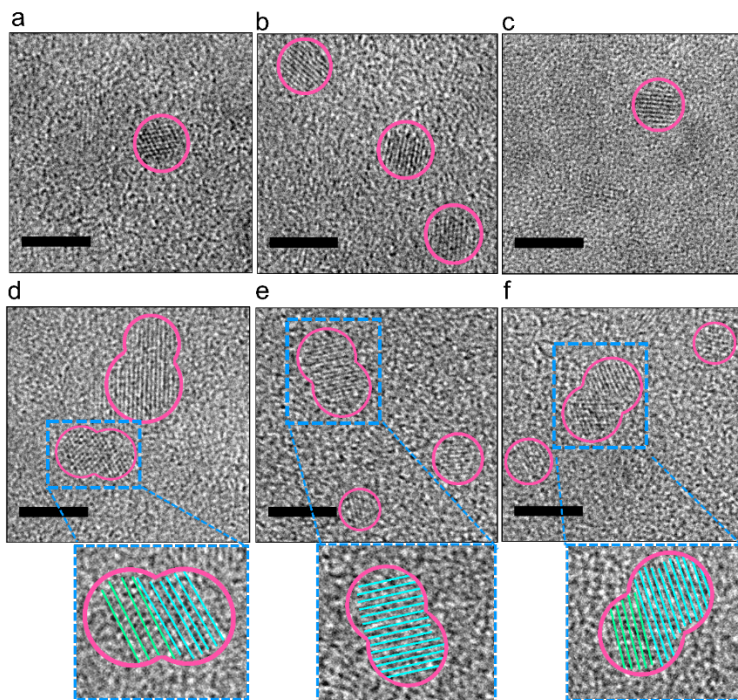

**Supplementary Figure 9. HR-TEM image of AEP-CaF<sub>2</sub> NCs (25 min after reaction initiation).** (a)-(c) Single crystalline particles detected with d spacing of  $d = 0.315$  nm of CaF<sub>2</sub> NCs. (d)-(f) Detected coalesced NCs demonstrating the fusion of the crystalline cores. The inset at the bottom of the lines in green and turquoise illustrates the CaF<sub>2</sub> lattice planes of the two NCs coalesced to form boundary defects.

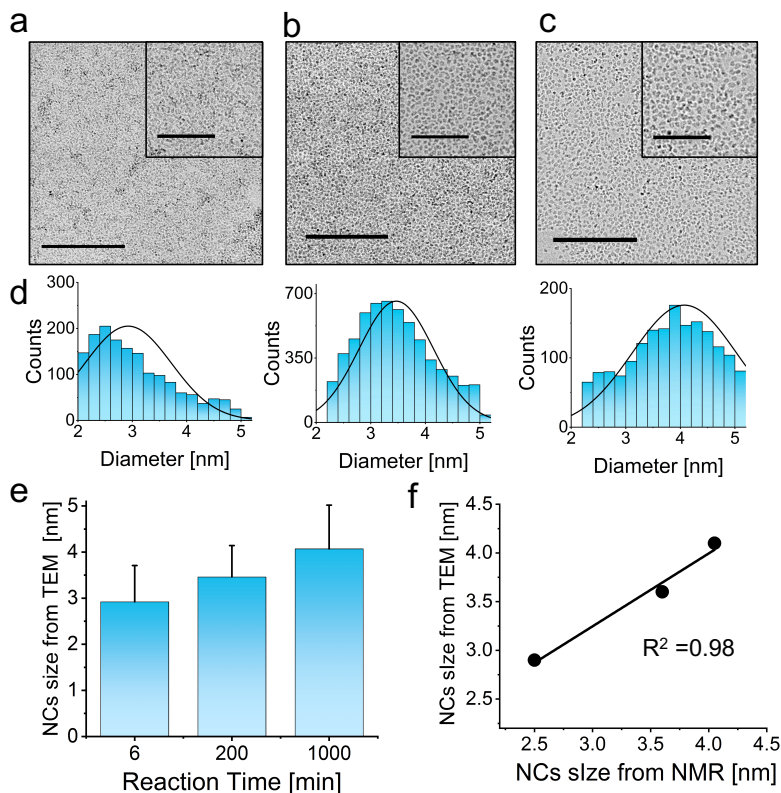

**Supplementary Figure 10. Cryo-TEM of AEP-CaF<sub>2</sub> formation.** Cryo-TEM of samples taken from the reaction mixture after (a) 6 min, (b) 200 min and (c) 1000 min. Scale bar 100 nm (inset 50 nm). (d) Particle size distribution histogram of the of AEP-CaF<sub>2</sub> NC by Cryo-TEM at different time point of the synthesis; (e) AEP-CaF<sub>2</sub> NC diameters, as calculated from the Cryo-TEM images (a-c), (a) 6min, D = 2.9 ± 0.8nm, (b) 200min, D = 3.4 ± 0.7nm and (c) 1000min, D = 4.1 ± 0.9nm. (f) Correlation between the NC size as measured from Cryo-TEM images and from <sup>19</sup>F-NMR spectra.

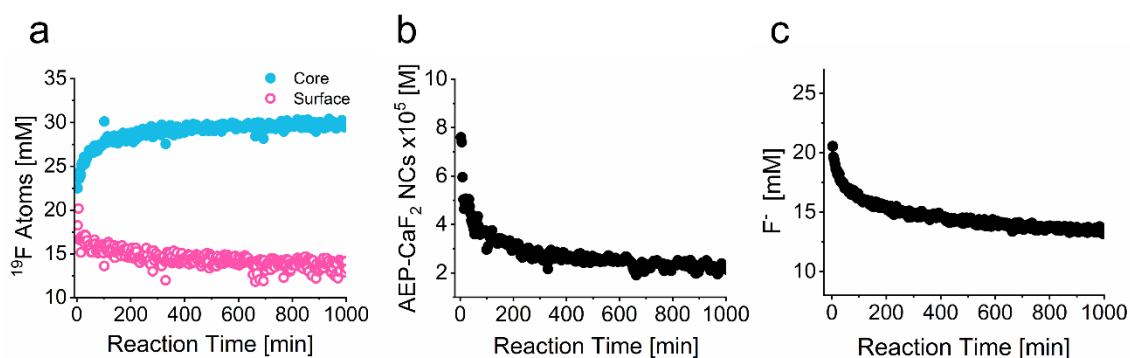

**Supplementary Figure 11. Real-Time <sup>19</sup>F HRNMR synthesis of AEP-SrF<sub>2</sub> NCs in water** (a) <sup>19</sup>F core atoms calculated from the deconvoluted peak area at -89ppm, every 3 minutes (in light blue) and <sup>19</sup>F surface atoms calculated from the convoluted peak area at -87ppm, every 3 minutes (in pink) (b) The concentration of AEP-SrF<sub>2</sub> NCs in solution with time calculated from Supplementary Note 2 (c) <sup>19</sup>F NMR monitoring the concentration of F<sup>-</sup> (peak at -120ppm) in solution during the synthesis of AEP-SrF<sub>2</sub> NCs.

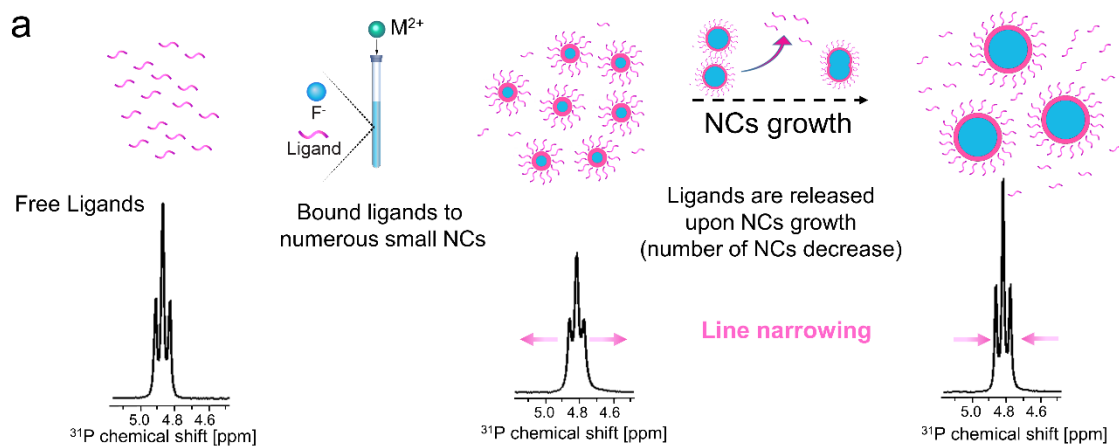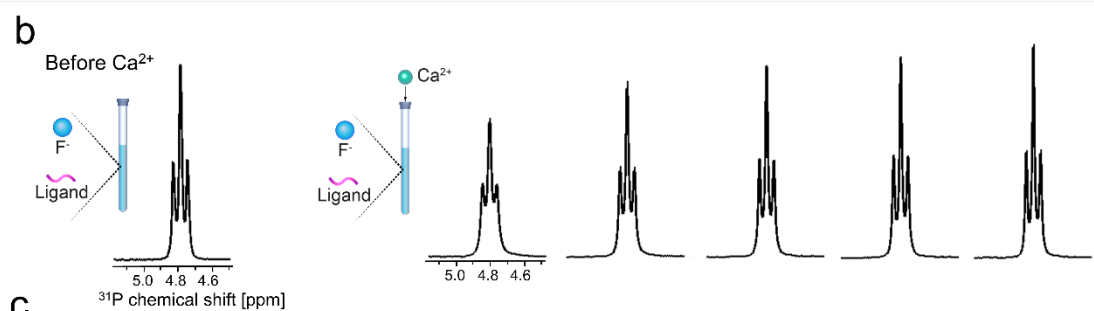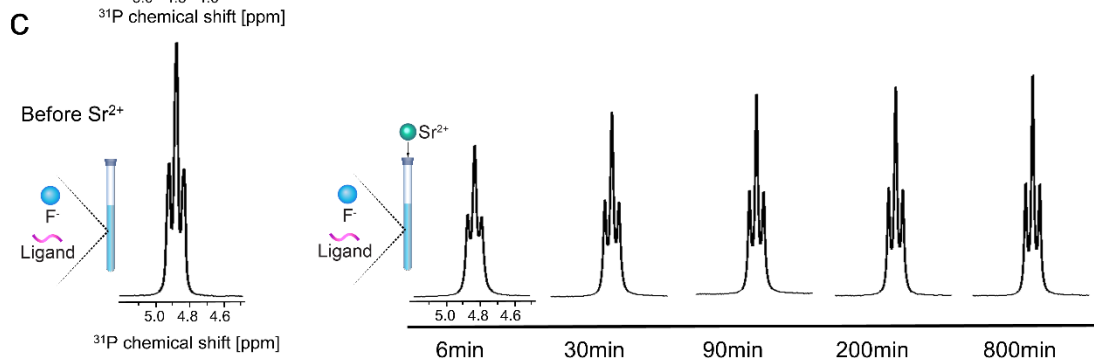

**Supplementary Figure 12.  $^{31}\text{P}$ -NMR monitoring the AEP ligand in real time.** (a) Schematic illustration of the ligands release during the NCs growth and the appearance of the AEP triplet before, during and at the end of the synthesis. (b)  $^{31}\text{P}$ -NMR of the AEP ligand before the addition of  $\text{Ca}^{2+}$  and after the AEP- $\text{CaF}_2$  NCs reaction initiation. (c)  $^{31}\text{P}$ -NMR of the AEP ligand before the addition of  $\text{Sr}^{2+}$  and after the AEP- $\text{SrF}_2$  NCs reaction initiation.

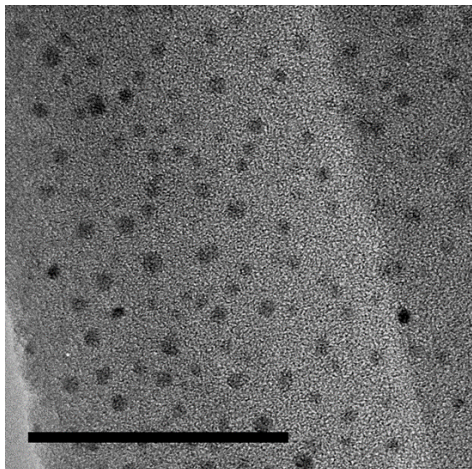

**Supplementary Figure 13.** TEM image of Cit-CaF<sub>2</sub> after 1000min of reaction with a particle size distribution from TEM of  $D= 3.2\pm 1.0$  nm.(Scale bar 50nm).

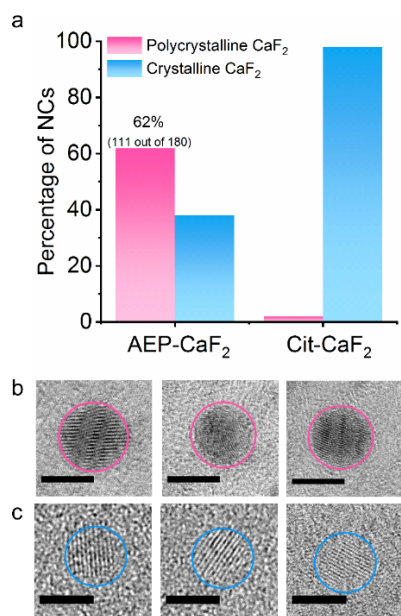

**Supplementary Figure 14. Statistical analysis of CaF<sub>2</sub> crystallinity** (a) Statistical analysis of defected vs. crystalline NCs detected with HR-TEM of AEP-CaF<sub>2</sub> and Cit-CaF<sub>2</sub> NCs. HR-TEM images of single particles either (b) AEP-CaF<sub>2</sub> NCs or (c) Cit-CaF<sub>2</sub> NCs.

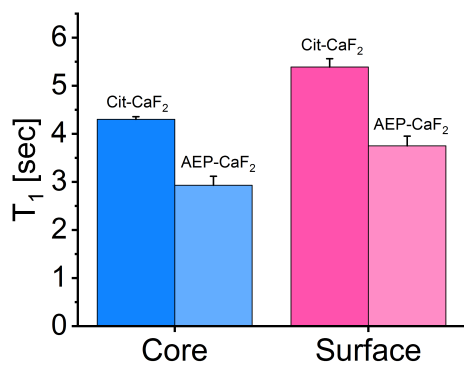

**Supplementary Figure 15.  $^{19}\text{F}$   $T_1$  relaxation properties of CaF<sub>2</sub> NCs in water.** Cit-CaF<sub>2</sub>  $T_1$  relaxation properties of the deconvolved NC components (core in blue and surface in pink). AEP-CaF<sub>2</sub>  $T_1$  relaxation properties of the deconvolved NC components (core in light blue and surface light lighth pink).components (core in light blue and surface in light pink).

## Supplementary Notes

### Supplementary Note 1; Derivation of Equation 1.

Calculating the size of the NCs from the ratio between the convoluted NMR peaks of the surface  $^{19}\text{F}$  atoms and core  $^{19}\text{F}$  atoms.

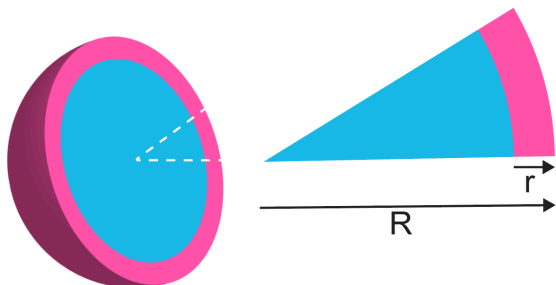

$$\frac{{}^{19}\text{F}_{\text{surface atoms}}}{{}^{19}\text{F}_{\text{core atoms}}} = \frac{V_{\text{surface}} \times d}{V_{\text{core}} \times d} = \frac{V_{\text{NC}} \times d - V_{\text{Core}} \times d}{V_{\text{core}} \times d} = \frac{\frac{4}{3}\pi R^3 - \frac{4}{3}\pi(R-r)^3}{\frac{4}{3}\pi(R-r)^3}$$
$$= \frac{R^3}{(R-r)^3} - 1$$

${}^{19}\text{F}_{\text{surface atoms}}$  are calculated from the deconvoluted area 1D NMR spectrum at  
– 105 ppm

${}^{19}\text{F}_{\text{core atoms}}$  are calculated from the deconvoluted area 1D NMR spectrum at  
– 109 ppm

$d$  – density of  $\text{MF}_2$  NCs

$V_{\text{surface}}$  – volume of outer sphere (pink)

$V_{\text{core}}$  – volume of inner sphere (light blue)

$V_{\text{NC}}$  – volume of NCs

$r$  – length of the outer surface, attributed to the ionic diameter of fluorine atoms ( $r = 0.266 \text{ nm}^1$ )

## Supplementary Note 2; Derivation of Equation 2.

Calculating the concentration of NCs in solution at each reaction time point based on real-time  $^{19}\text{F}$  NMR spectra.

The total number of NCs in solution;

$$N(t) = \frac{\text{Total number of } ^{19}\text{F atoms in NCs}(t)}{\text{Number of } ^{19}\text{F atoms per NC}(R(t))} = \frac{(1)}{(2)}$$

(1)

The total number of  $^{19}\text{F}$  atoms in a NC is the sum of the deconvoluted peaks assigned to the core and surface atoms at each time point, based on the 1D  $^{19}\text{F}$  NMR spectra.

$$(1) = {}^{19}\text{F}_{\text{core atoms}}(t) + {}^{19}\text{F}_{\text{surface atoms}}(t)$$

$${}^{19}\text{F}_{\text{core/surface atoms}}(t) = C_{\text{core/surface}}(t) \times V_{\text{reaction}} \times N_A$$

$C(t)$  – concentration of  $^{19}\text{F}$  atoms (core or surface) measured from the calibrated and convoluted integration area at each time point.

$V_{\text{reaction}}$  – reaction volume of 1 ml.

$N_A$  – Avogadro's constant ( $6.023 \times 10^{23}$ )

(2)

The number of  $^{19}\text{F}$  atoms in NCs is a function of their radii at each time point and is also determined by the properties of  $\text{MF}_2$  ( $\text{CaF}_2$  or  $\text{SrF}_2$ ) compounds, such as molecular weight ( $M_{w\text{MF}_2}$ ) or atom densities ( $d_{\text{MF}_2}$ ).

$$\text{moles of atoms per } \text{MF}_2 \text{ NC: } n\text{MF}_2 = \frac{d_{\text{MF}_2} \times V_{\text{MF}_2}}{M_{w\text{MF}_2}}$$

$$d_{\text{CaF}_2} = 3.18 \text{ gr/cm}^3, \quad M_{w\text{CaF}_2} = 78.07 \text{ gr/mol}$$

$$d_{\text{SrF}_2} = 4.24 \text{ gr/cm}^3, \quad M_{w\text{SrF}_2} = 125.62 \text{ gr/mol}$$

$$\text{Volume of NCs: } V_{\text{MF}_2} = \frac{4\pi (R(t))^3}{3}$$

Since each  $\text{MF}_2$  has 2  $^{19}\text{F}$  atoms per NC, the number of  $^{19}\text{F}$  atoms per  $\text{MF}_2$  NC can be calculated from:

$$2 \times n\text{MF}_2 \times N_A$$

$$\text{Number of } ^{19}\text{F atoms per } \text{CaF}_2 = 204.7 \times R(t)^3$$

$$\text{Number of } ^{19}\text{F atoms per } \text{SrF}_2 = 170.3 \times R(t)^3$$

Calculating the concentration of NCs(t),  $C_{NC}$ , in solution [M].

$$C_{NC} = \frac{N(t)}{N_A \times V_{reaction}} \quad (\text{Supplementary Equation 2})$$

$N(t)$  – number of NCs in solution

$N_A$  – Avogadro's constant ( $6.023 \times 10^{23}$ )

$V_{reaction}$  – reaction volume of 1ml.



## **Supplementary References**

1. Haynes, W.M. *CRC handbook of chemistry and physics*, (CRC press, 2014).
